# Supplementary material for: Inhibition of Rabies Virus by 1,2,3,4,6-Penta-O-galloyl-β-d-Glucose Involves mTOR-Dependent Autophagy
Source: MDPI journal article supplement (doi:10.3390/v10040201), 2018-04-17
Supplement: s1 [file s1]

## Supplementary Information

### Supplementary Figures:

Figure S1

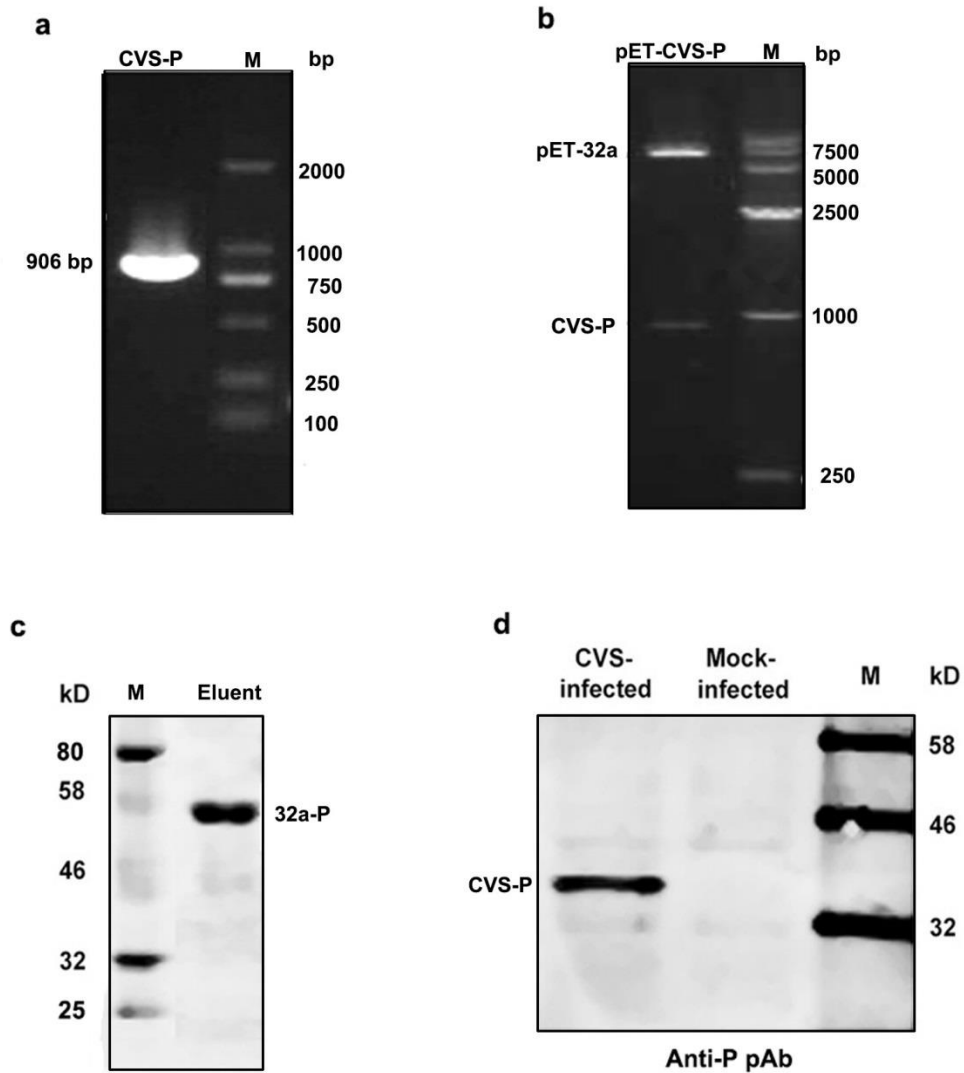

**Figure S1.** Preparation and identification of anti-RABV P protein polyclonal antibody (pAb). **(a)** Amplification of the RABV P gene by PCR. **(b)** Identification of recombinant plasmid by the restriction digestion with *Eco*RI and *Sal*I. **(c)** Identification of the purity of the purified recombinant protein 32a-P by SDS-PAGE. **(d)** Identification of the specificity of the polyclonal antibody by Western blotting.

**Figure S2**

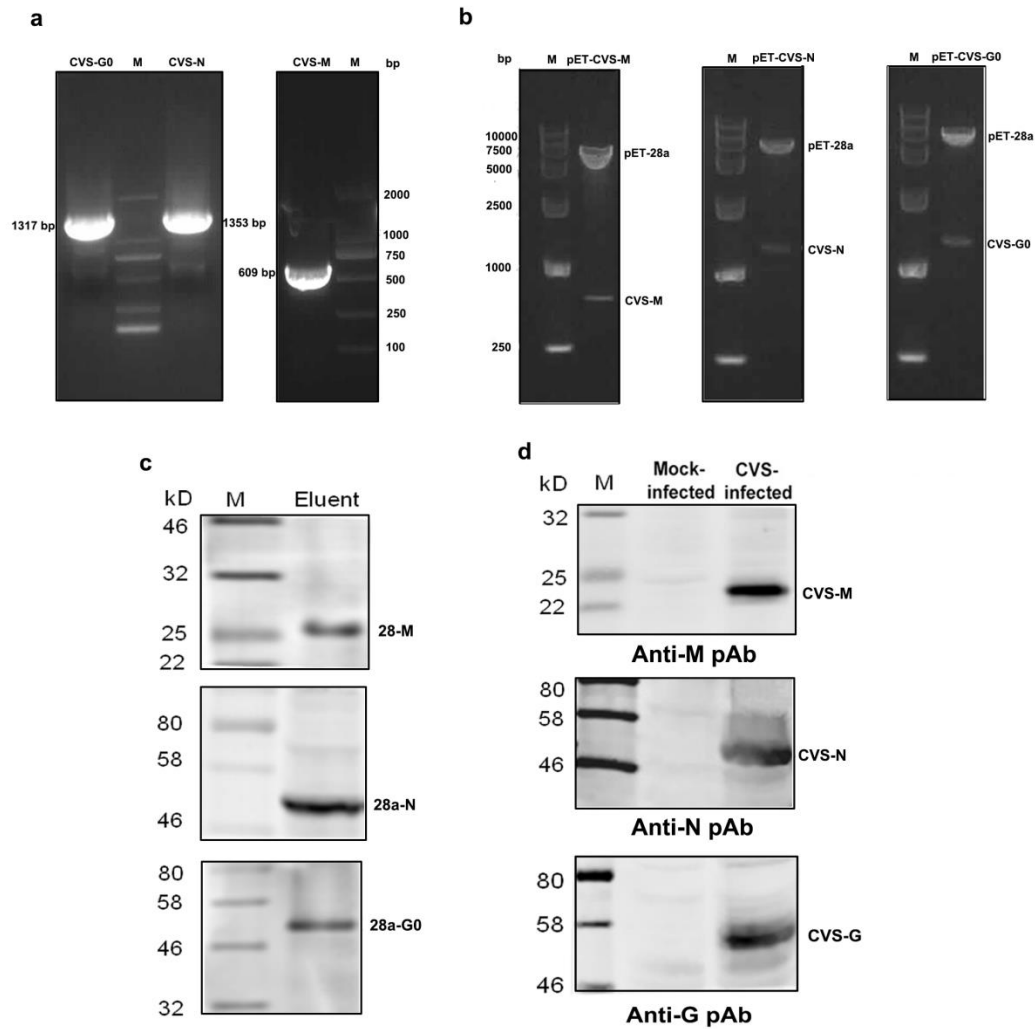

**Figure S2.** Preparation and identification of anti-RABV M, N, and G proteins polyclonal antibodies. **(a)** Amplification of the RABV M and N genes by PCR. **(b)** Identification of recombinant plasmid by restriction digestion. **(c)** Identification of the purity of purified recombinant protein by SDS-PAGE. **(d)** Identification of the specificity of polyclonal antibodies by Western blotting.

## **Supplemental Methods**

### **Preparation and identification of polyclonal antibodies**

The primers were designed to amplify the RABV M, N, G0 (extracellular domain) genes from CVS-infected BHK-21 cells by PCR, for construction of the recombinant prokaryotic expression plasmid pET-28a-X. Recombinant plasmid was then identified by restriction digestion with *EcoRI* and *SalI*. After induction and purification of the recombination protein 28a-X with Ni-NTA His-bind resin (Merck Millipore), the purity was identified by SDS-PAGE. Finally, the purified recombination protein 32a-P (50 µg) was used to immunize the Kunming mice by multipoint subcutaneous injection in Freund's adjuvant, with a total of three times of immunization with a time interval of two weeks. Upon collecting the anti-X protein polyclonal serum, polyclonal antibody was purified by HiTrap Protein G HP (GE Healthcare Life Sciences) and identified by Western blotting.
